8. Gine-Garriga M, Guerra M, Pages E, Manini TM, Jimenez R, Unnithan V. The effect of functional circuit training on physical frailty in frail older adults: a randomized controlled trial. *J Aging Phys Act* 2010; 18: 401–24.
9. NSW Health. N NSW Health Rehabilitation Redesign Project Final Report – Model of Care Version 1.4, 2011. <http://www.aci.health.nsw.gov.au/resources/rehabilitation/rehabilitation-model-of-care/NSW-Rehabilitation-moc-2014.pdf> (3 September 2013, date last accessed).
10. Folstein MF, Folstein SE, McHugh PR. Mini-Mental State: a practical method for grading the cognitive state of patients for the clinician. *J Psych Res* 1975; 12: 189–98.
11. Scrivener K, Sherrington C, Schurr K, Treacy D. Many participants in inpatient rehabilitation can quantify their exercise dosage accurately: an observational study. *J Physiother* 2011; 57: 117–22.
12. Treacy D, Schurr K, Sherrington C. Balance circuit classes to improve balance among rehabilitation inpatients: a protocol for a randomised controlled trial. *BMC Geriatr* 2013; 13: 75.
13. Guralnik JM, Simonsick EM, Ferrucci L et al. A Short Physical Performance Battery assessing lower extremity function: association with self-reported disability and prediction of mortality and nursing home admission. *J Gerontol A Biol Sci Med Sci* 1994; 49: 85–94.
14. Sherrington C, Lord SR, Close JC et al. Development of a tool for prediction of falls in rehabilitation settings (Predict\_FIRST): a prospective cohort study. *J Rehabil Med* 2010; 42: 482–8.
15. Sherrington C, Lord SR, Close JCT et al. Mobility-related disability three months after aged care rehabilitation can be predicted with a simple tool: an observational study. *J Physiother* 2010; 56: 121–7.
16. Twisk J, Proper K. Evaluation of the results of a randomized controlled trial: how to define changes between baseline and follow-up. *J Clin Epidemiol* 2004; 57: 223–8.
17. Perera S, Mody SH, Woodman RC, Studenski SA. Meaningful change and responsiveness in common physical performance measures in older adults. *Am Geriatr Soc* 2006; 54: 743–9.
18. Hill AM, Hoffmann T, Hill K et al. Measuring falls events in acute hospitals—a comparison of three reporting methods to identify missing data in the hospital reporting system. *J Am Geriatr Soc* 2010; 58: 1347–52.
19. Sherrington C, Pamphlett P, Jacka J et al. Group exercise can improve participants' mobility in an outpatient rehabilitation setting: a randomized controlled trial. *Clin Rehabil* 2008; 22: 493–502.
20. Hill AM, Etherton-Beer C, Haines TP. Tailored education for older patients to facilitate engagement in falls prevention strategies after hospital discharge—a pilot randomized controlled trial. *PLoS ONE* 2013; 8: e63450.

Received 6 June 2014; accepted in revised form 3 December 2014

*Age and Ageing* 2015; 44: 586–592  
doi: 10.1093/ageing/afv042  
Published electronically 11 April 2015

© The Author 2015. Published by Oxford University Press on behalf of the British Geriatrics Society.  
All rights reserved. For Permissions, please email: journals.permissions@oup.com

## The factors associated with self-reported physical activity in older adults living in the community

GABRIELLE MCKEE<sup>1</sup>, PATRICIA M. KEARNEY<sup>2</sup>, ROSE ANNE KENNY<sup>3</sup>

<sup>1</sup>School of Nursing and Midwifery, Trinity College Dublin, Dublin, Ireland

<sup>2</sup>Epidemiology and Public Health, University College Cork, Cork, Ireland

<sup>3</sup>Centre for Medical Gerontology, Trinity College Dublin, Dublin, Ireland

Address correspondence to: G. McKee. Tel: (+353) 18963001; Fax: (+353) 18962779. Email: gmckee@tcd.ie

### Abstract

**Background:** despite the vast literature in the area, few studies examined the large range of factors associated with physical activity (PA) in the older adult collectively, information that could help develop a supportive culture for healthy ageing.

**Objective:** to identify the socio-demographic, social connectedness, physical environment and physical and mental health-related factors associated with PA.

**Setting and participants:** adults aged 65 and over living in the community ( $n = 3499$ ).

**Methods:** this study used a cross-sectional design. Self-report, interview and physical assessment were the data collection methods used. The International Physical Activity Questionnaire (short form) measured PA in metabolic equivalents.

**Results:** 31.8% of older people did not meet the recommended guidelines. The regression model was significant, explaining 31.3% of the variance in PA ( $F = 34.32$ ,  $P < 0.001$ ). In order of strength of relationship, the  $\beta$  coefficients, the variables time

spent sitting, gender, quality of life, grip test, disability, age, depression, BMI, anxiety, employment, member of a non-church club, type of house and cognitive ability were significant factors associated with PA.

**Conclusion:** from a range of 40 original variables, this study identified the variables most strongly related to PA were not physical health or physical environment. They included modifiable variables, such as time spent sitting and mental health, which can be actively targeted in policy and practice. They also included non-modifiable variables such as gender and age that can be addressed through increased awareness and targeted health promotion.

**Keywords:** *physical activity, determinants, older adults, community dwelling*

## Background

Guidelines recommend the equivalent of at least 30 min a day of moderate intensity activity 5 days a week for older adults [1]. Making recommendations is not enough; we need to understand the factors associated with physical activity (PA) in the older adult to optimise participation.

Utilising both objective and direct measurements research to date has identified many factors associated with PA in older adults [1–3]. These include many socio-demographic characteristics. Higher PA has been associated with younger age [1, 3–12], males [1, 2, 4, 6, 11–15], married [7, 12, 13] and higher education [2, 3, 7, 8, 12–14, 16]. Higher PA is also associated with higher income or socio-economic status [7, 8, 12, 13], certain modes of transport [4] and not been employed [2, 4, 12].

Social connectedness also has been shown to influence PA. Low PA has been associated with poor social networks [5, 17, 18], lack of company [6, 9, 18, 19], living alone [6, 16], loneliness [12, 15] and location of residence [1, 4, 7]. Research has also shown that indicators of poor environment and neighbourhood safety are associated with low activity levels [4, 6, 9, 12, 16].

In addition there are health factors that have been identified with lower PA levels. Lower PA levels is associated with higher BMI [3, 7, 11, 14, 15], smoking [2, 3, 7], higher alcohol use [5], diabetes [4, 15], injury/disability/medical condition/functional limitations [2, 4, 5, 8, 9, 12, 13, 18, 19], and higher number of medications [12].

The main psychosocial and appraisal barriers that directly and indirectly affect participation in PA include depression, general health and self-rated health [2, 4, 12, 14, 15, 18], vision [5] and fear of falling or injury [12, 19].

Despite the vast array of research there is a need for studies that contain representative samples of community-based older adults, utilise a reliable tool, analyse collectively a wide range of variables, in order to validate the cited associations with PA in older adults [1, 12]. Analysis of this nature will provide a hierarchy of the importance of the factors known to influence PA. These factors can then be used to inform and prioritise changes in policy and practice so as to optimise healthy ageing.

## Aim and objectives

The aim of this study was to determine the socio-demographic, social connectedness, physical environment and physical and

mental health-related factors associated with self-reported PA in community living older adults in the early 21st century.

## Methods

### Sample and recruitment

The cross-sectional study was based within a large prospective cohort study—The Irish Longitudinal Study on Ageing (TILDA) [<http://www.tcd.ie/tilda/> (27 March 2015, date last accessed)]. The sample was selected using a random stratified sample of the population aged 50 and over living at home between 2009 and 2011 [<http://tilda.tcd.ie/assets/pdf/DesignReport2010.pdf> (27 March 2015, date last accessed)]. The response rate was 62.0% [20].

### Data collection

The majority of data collection took place in the participants' home either through interview by a trained interviewer and by self-completion questionnaire. Assessment of physical measurements such as BMI and grip strength was by trained research nurses when the participants visited a health assessment centre or in their own home.

The study used the IPAQ short-form questionnaire to determine PA. This recorded minutes per week vigorous activity, moderate activity, walking and sitting. These were converted to total energy expenditure per week in METs (Metabolic equivalents) for the regression models and subsequently categorised for comparison with other studies utilising IPAQ scoring guidelines [21; <https://sites.google.com/site/theipaq/scoring-protocol> (27 March 2015, date last accessed)].

The 40 potential factors were grouped into five main categories: socio-demographic, physical health, mental health, social connectedness and physical environment. The socio-demographic factors were: gender, age, marital status, education, medical insurance status, household composition, employment, socio-economic status, household income and transport. The health-related variables were: smoking, alcohol (CAGE alcohol scale [22]), time spent sitting (IPAQ), number of chronic conditions, fall history, pain, disability (activities of daily living), self-rated vision, self-rated hearing, number of medications, BMI, waist-hip ratio, grip strength and childhood illness. The social variables included social connectedness score [23], participation in non-church club,

attends church and loneliness (UCLA scale [24]). The mental health parameters were cognitive ability (Mini Mental state exam, MMSE), anxiety (HADS anxiety scale [25], depression (CES-D scale [26]), worry, memory and quality of life. The built environment variables examined were: location of home, physical state of buildings in area, vandalism in area, type of housing and litter in area.

### Analysis

Analysis used SPSS version 20. PA in METs was log-transformed, as it had a marked left skewness. Bivariate analyses utilised *t* tests, Pearson's correlation or ANOVA as appropriate. Hierarchical multiple regression analysis was used to identify the variables associated with PA. To achieve the most parsimonious final model, we deleted factors from the analysis for two reasons. Firstly, if the collinearity between factors was high ( $r > 0.7$ ) the factor with the weaker relationship to PA was removed. Secondly, factors were removed from the final model if their correlation to PA was of low significance ( $P > 0.7$ ). The significance level was set at  $<0.05$ . The significance level within the bivariate analysis was corrected using Bonferroni adjustment for 40 variables and was therefore set at 0.001.

### Results

The study recruited 3,499 people aged 65 and over of which 3,475 completed the IPAQ questionnaire which made up the sample available for the analysis.

### Sample descriptives

The sample had an average age of  $72.6 \pm 5.2$  years and a BMI of  $28.5 \pm 4.5$  kg/m<sup>2</sup>. A greater proportion were: female (53%), in the 65–69 age group (34%), widowed (34%), lived alone (32%), were rarely lonely (79%), not disabled (82%), retired (69%), had no chronic conditions (57%) and were not often troubled with pain (64%) (Tables 1 and 2 and Appendix S1 available as Supplementary data in *Age and Ageing* online).

### Physical activity

The analysis categorised 32, 34 and 34% as having low, medium or high PA, respectively. The proportions within the PA categories differed significantly across the age groups [ $\chi^2(6, n = 3475) = 151, P < 0.001$ ]. The proportion of individuals in the high PA category declined with age and the proportion of individuals in the low activity category increased with age (Figure 1). This resulted in the number of participants not achieving recommended exercise levels ranging from 28% in the youngest age group (65–69 years) to 55% in the oldest age group (>80 years) (Figure 1).

### Bivariate analysis

Of the 40 factors examined, 31 were significantly associated with PA (METs per week). The variables not reaching statistical significance were: total household income, waist–hip

ratio, alcohol, smoking, childhood illness, attends church, living location, vandalism and litter (Table 1 and Appendix S1 available as Supplementary data in *Age and Ageing* online).

### Multivariate analysis

There was no violation of the assumptions of normality, linearity or homoscedasticity. The nine variables non-significant in the bivariate analyses were removed from the final multivariate model. The first exploratory model revealed that there was too close a relationship between social connectedness/non-church attendance; worry/anxiety; and social class/employment; chronic health problems/long-term illness, so social connectedness, worry, social class and chronic health problems were removed from the model. Finally, review of the model indicated a low significant relationship between PA and marital status, insurance status, household composition and transport used, so these variables were removed from the model.

The final model with 23 variables was significant and explained 31.3% of the variance in PA ( $F(23, 1,752) = 34.32, P < 0.001$ ). In this model, 13 variables remained significant (Table 2). In the order of strength of relationship ( $\beta$  coefficient): more time spent sitting, being female, having a lower quality of life, a lower grip test, more disabilities of daily living, being older, having a higher depression score, having a higher BMI, having a higher anxiety score, not employed, not a member of a non-church club, not living in a detached house/farm, and having a lower cognitive ability score were significantly associated with lower PA (Table 2).

### Discussion

A total of 68.1% older adults met the national and international guidelines for recommended PA. This falls within the majority of previous self-report and objective studies results, which range from 2.4 to 83% [1, 4]. The percentage of older adults meeting the recommended levels of activity is on the high side of normal. Self-reporting of PA is often cited as leading to increased estimates. This could be due to giving the desirable answer or difficulty in recalling low levels of PA. In addition, the conversion of recorded activity from minutes to METs may cause an overestimation of activity as the METs values are most likely based on calculations from a younger population [27]. However, studies that have examined both methods have shown inconsistent results [1] and the correlation between results from both methods have been shown to be moderate [27].

The strength of this study is the multivariate analysis of a large number of factors from across a wide range of categories seldom examined together previously [17].

In support of some previous studies but in contrast to many studies, using both self-report and objective measures, education [7, 8, 12–14, 16], indicators of socio-economic status including income [7, 8, 13] and transport [4] were not significant in this study. However, in support of most previous research being female [1, 2, 4, 6, 8, 11–13, 19], and older [1–4, 6, 9, 11, 12, 17],

## The factors associated with self-reported physical activity in older

**Table 1.** Demographic profile and bivariate analysis of the factors that are associated with physical activity of participants (IPAQ MET minutes per week) in the final multivariate model (*t* test unless otherwise stated) (see Appendix S1 available as Supplementary data in *Age and Ageing* online for complete profile)

|                                                               | Number/percentage/mean | IPAQ METs mean | <i>t</i> | <i>P</i> -value |
|---------------------------------------------------------------|------------------------|----------------|----------|-----------------|
| <b>Socio-economic variables</b>                               |                        |                |          |                 |
| Gender ( <i>n</i> = 3475)                                     |                        |                |          |                 |
| Male                                                          | 1646 (47)              | 3023 ± 3409    | 12.70    | <0.001*         |
| Female                                                        | 1829 (53)              | 1847 ± 2472    |          |                 |
| Age group ( <i>n</i> = 3475) <sup>b</sup>                     |                        |                | 77.48    | <0.001*         |
| 65–69                                                         | 1191 (34)              | 3046 ± 3370    |          |                 |
| 70–74                                                         | 957 (27)               | 2541 ± 2895    |          |                 |
| 75–79                                                         | 709 (20)               | 2024 ± 2759    |          |                 |
| 80+                                                           | 618 (18)               | 1429 ± 2168    |          |                 |
| Employment status ( <i>n</i> = 3475) <sup>b</sup>             |                        |                | 7.80     | <0.001*         |
| Employed                                                      | 704 (20)               | 1978 ± 3470    |          |                 |
| Retired and other                                             | 2771 (79)              | 2512 ± 2873    |          |                 |
| <b>Social connectedness</b>                                   |                        |                |          |                 |
| Membership of non-church club ( <i>n</i> = 3475) <sup>b</sup> |                        |                | –9.84    | <0.001*         |
| Yes                                                           | 1694 (49)              | 2736 ± 3140    |          |                 |
| No                                                            | 1781 (51)              | 2088 ± 2848    |          |                 |
| <b>Built environment variables</b>                            |                        |                |          |                 |
| Type of housing ( <i>n</i> = 2669) <sup>b</sup>               |                        |                | 4.45     | 0.001*          |
| Detached                                                      | 1344 (50)              | 2473 ± 3133    |          |                 |
| Semi-detached                                                 | 639 (24)               | 2167 ± 2567    |          |                 |
| Terrace                                                       | 496 (19)               | 1856 ± 2489    |          |                 |
| Apartment                                                     | 49 (2)                 | 1747 ± 1938    |          |                 |
| Farm                                                          | 1419 (5)               | 3305 ± 3959    |          |                 |
| <b>Physical health</b>                                        |                        |                |          |                 |
| Disability (3475) <sup>b</sup>                                |                        |                | 107.38   | <0.001*         |
| Not disabled                                                  | 2865 (82)              | 984 ± 1741     |          |                 |
| IADL disability only                                          | 175 (5)                | 2115 ± 3072    |          |                 |
| ADL disability only                                           | 222 (6)                | 598 ± 1465     |          |                 |
| IADL and ADL disability                                       | 213 (6)                | 2648 ± 3082    |          |                 |
| Time spent sitting (Hours) ( <i>n</i> = 3444)                 | 310 ± 151              |                | –0.364   | <0.001*         |
| Grip strength (kg) ( <i>n</i> = 2331) <sup>a</sup>            | 23.5 ± 8.9             |                | 0.303    | <0.001*         |
| BMI (kg/m <sup>2</sup> ) ( <i>n</i> = 3475) <sup>a</sup>      | 28.5 ± 4.5             |                | –0.112   | <0.001*         |
| Experienced fall in past year ( <i>n</i> = 3474)              |                        |                | –3.60    | 0.001*          |
| Yes                                                           | 759 (22)               | 2181 ± 2998    |          |                 |
| No                                                            | 2715                   | 2467 ± 3013    |          |                 |
| <b>Mental health</b>                                          |                        |                |          |                 |
| Anxiety HADS-A scale ( <i>n</i> = 2750) <sup>a</sup>          | 4.7 ± 3.5              |                | –0.075   | <0.001*         |
| Mini Mental State examination ( <i>n</i> = 2363) <sup>a</sup> | 27.6 ± 2.6             |                | 0.193    | <0.001*         |
| Quality of life ( <i>n</i> = 2329) <sup>a</sup>               | 44.5 ± 7.4             |                | 0.290    | <0.001*         |
| Depression CES-D ( <i>n</i> = 3403) <sup>a</sup>              | 5.6 ± 6.5              |                | –0.220   | <0.001*         |
| Worry ( <i>n</i> = 2517)                                      | 14.6 ± 7.3             |                | –0.125   | <0.001          |

\*Significant at ≤0.001.

<sup>a</sup>Correlation tests used.

<sup>b</sup>Analysis of variance used.

and being employed were associated with lower PA [2, 12]. The strength of the relationship between these factors and PA was ranked as follows: gender 2nd, age 4th and employment 10th (Table 2). The association between being employed and lower PA is worrying, as current policy and processes are aiming to increase the number of years spent working, which will delay the increased PA we observe at first retirement. Although these variables are non-modifiable, awareness that gender and age are strong influences on PA, should be used to specifically target health promotion in females and the older old, including promoting PA for as long as possible.

In contrast to most previous studies the majority of social connectedness and physical environment variables when

examined in a multivariate manner were not significant [4–6, 9, 13, 15–17]. However, been a member of a non-church organisation and house type were significant and were ranked 11th and 12th, respectively, in their strength of relationship with PA. Those who lived in detached houses or farms were more physically active. Whether this is an indicator of wealth or location of house is hard to see, but whichever, it does imply that we need to be aware that those living in housing such as apartments are less likely to be physically active and would therefore need more encouragement. Caution must be used is the applicability of this results. This study did use questions previously used to reflect the physical environment; however, they only indicate a limited perspective of

**Table 2.** Final multiple regression model of the factors associated with physical activity in the older adult ( $n = 596$ )

|                                     | $\beta$ | $t$     | 95.0% Confidence |        | % of variance explained by each variable | P-value |
|-------------------------------------|---------|---------|------------------|--------|------------------------------------------|---------|
|                                     |         |         | Lower            | High   |                                          |         |
| Gender                              | -0.127  | -4.247  | -0.228           | -0.084 | 0.7%                                     | <0.001* |
| Age in categories                   | -0.081  | -3.541  | -0.070           | -0.020 | 0.4%                                     | <0.001* |
| Education                           | 0.013   | 0.592   | -0.024           | 0.044  |                                          | 0.554   |
| Employment status                   | -0.062  | -2.775  | -0.120           | -0.021 | 0.3%                                     | 0.006*  |
| Loneliness (UCLA loneliness scale)  | 0.041   | 1.624   | -0.007           | 0.079  |                                          | 0.105   |
| Membership of non-church club       | 0.063   | 2.958   | 0.026            | 0.127  | 0.3%                                     | 0.003*  |
| Physical state of buildings in area | -0.024  | -1.161  | -0.060           | 0.015  |                                          | 0.246   |
| Type of house                       | 0.054   | 2.698   | 0.004            | 0.028  | 0.3%                                     | 0.007*  |
| Disability                          | -0.095  | -4.102  | -0.101           | -0.036 | 0.7%                                     | <0.001* |
| Time spent sitting (hours per day)  | -0.250  | -11.567 | -0.001           | -0.001 | 5.3%                                     | <0.001* |
| Grip test (dominant hand)           | 0.111   | 3.706   | 0.004            | 0.011  | 0.5%                                     | <0.001* |
| Often troubled with pain            | 0.013   | 0.580   | -0.039           | 0.072  |                                          | 0.562   |
| BMI                                 | -0.069  | -3.322  | -0.015           | -0.004 | 0.4%                                     | 0.001*  |
| Long-term illness                   | -0.017  | -0.713  | -0.046           | 0.021  |                                          | 0.476   |
| Self-rated vision                   | -0.025  | -1.083  | -0.044           | 0.013  |                                          | 0.279   |
| Self-rated hearing                  | -0.023  | -1.051  | -0.038           | 0.011  |                                          | 0.293   |
| Number of regular medications       | -0.037  | -1.634  | -0.047           | 0.004  |                                          | 0.103   |
| Fallen in the last year             | -0.011  | -0.517  | -0.075           | 0.044  |                                          | 0.605   |
| Anxiety (HADS-A)                    | 0.068   | 2.846   | 0.004            | 0.020  | 0.3%                                     | 0.004*  |
| Quality-of-life scale (CASP-19)     | 0.127   | 5.049   | 0.006            | 0.015  | 1%                                       | <0.001* |
| Depression (CES-D scale)            | -0.073  | -2.553  | -0.012           | -0.002 | 0.3%                                     | 0.011*  |
| Mini Mental State examination       | 0.052   | 2.309   | 0.002            | 0.023  | 0.2%                                     | 0.021*  |
| Self-rated memory                   | -0.016  | -0.707  | -0.039           | 0.018  |                                          | 0.479   |

BMI, body mass index.

\*Significant at  $< 0.05$ .

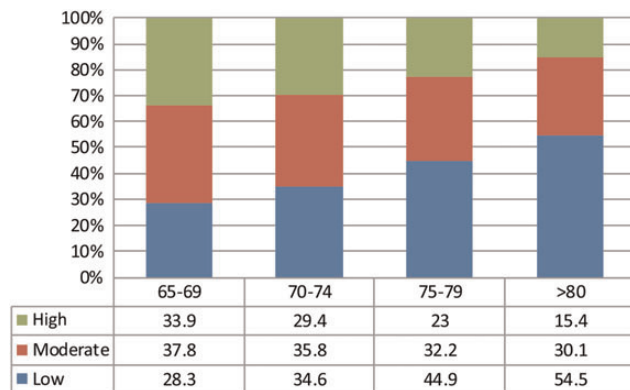

**Figure 1.** Percentage of participants in the different categories of physical activity across the age groups.

this parameter compared with other studies. While the physical environment does not arise as a main factor in this study, a poor or unsafe environment may contribute to anxiety, which was a significant variable. Creating a good environment that relieves the anxiety of the individuals may help improve PA. The observation that being a member of a non-church organisation was significant is an easy point to import into practice and health promotion.

Despite findings from most previous studies, most physical health predictors were not significant in the mix of variables examined in this multivariate study [2–5, 12, 13, 15, 17, 28]. In support of previous findings this study found that time spent sitting, grip strength, disability [2, 5, 12] and BMI [2, 3, 11, 12,

14, 15] were significantly associated with PA, ranking 1st, 4th, 5th and 8th, respectively, in their strength of association with PA. This seems to indicate it is neither the illness itself, nor the presence of most symptoms, even pain, but rather only when the illness gets so severe that it becomes a functional limitation that it significantly interferes with PA. Most of the factors significant here are modifiable and are therefore open to intervention at an individual and health promotion level. In this regard we should therefore promote activity despite disease for as long as possible. Time spent sitting had the strongest influence on PA, longer sitting times being associated with low PA. While this may be somewhat expected, those who sit a lot may include those who are very inactive and those who only do short bouts of activity even though this might be vigorous. This is an interesting finding and needs further investigation to explore the relationship between PA, sitting and subsequent health.

In support of previous studies, this study found that of the variables that remained significant, four were mental health variables. These were quality of life, depression, anxiety and cognitive ability [4, 9, 12, 29], ranking 2nd, 7th, 9th and 13th with regard their  $\beta$  coefficients, respectively. The relationship between PA and these factors may be bidirectional, i.e. PA influencing depression and depression influencing PA [29]. Although the relationship between mental health and PA is well established, it has not been explored in many of the large population-based studies [9, 12]. This finding indicates that policy and practice need to both be aware that those with mental health issues tend to have lower PA and facilitate intervention to increase PA within this group. This may not only improve the physical health but also improve the mental

health issues themselves. It is interesting to observe that while many of the physical health variables did not remain significant the mental health variables did.

It seems that the type of analysis used in this study, the variety and number of variables from many different domains were probable contributing factors in the difference in significance of the variables in this study compared with previous research revealing a hierarchy of variables that could be targeted to improve PA in the older adult.

## Conclusion

This study has identified that when examined in a multivariate manner, with many factors, the main factors that influence PA were not physical health or physical environment. But are how many hours we sit a day, gender, functional ability, mental health and employment status. The more important influence of mental health compared with physical health was identified and has not previously been well established or attended to in practice or health promotion. This does not negate the influence of previously identified factors shown to influence PA, but it does indicate that these factors may have a mediating rather than a core influence on PA. Overall this information is useful to practitioners so that they can be aware of the most important factors that influence PA participation and so target PA intervention for these subgroups. In addition, the identification of specific modifiable factors may alert practice to the need to attend and modify these factors in order to optimise any PA health promotion strategies.

## Limitations

The profile of the participants was a good match to the Irish population with a small underrepresentation of those with lower levels of education [20]. The use of self-report PA, particularly with relation to the levels of PA, may give rise to overestimations of PA for the reasons previously cited in the discussion. While this study did use a large range of factors, it did not survey the interest of the participants in PA, a dominant influence on participation in PA [9, 12, 17].

## Key points

- Many factors previously seen to influence PA did not emerge as significant in this study.
- The most important influences of PA were not disease or physical environment.
- Sitting, gender functional ability and mental health were the most important factors associated with PA.
- The significance of factors such as age and gender reinforce the need to target subgroups to optimise their PA.
- Modifiable factors such as time spent sitting and mental health need to be addressed in interventions and health promotion.

## Funding

This study was supported by The Department of Health and Children; Irish Life and The Atlantic Philanthropies.

## Conflicts of interest

None declared.

## References

1. Sun F, Norman IJ, While AE. Physical activity in older people: a systematic review. *BMC Public Health* 2013; 13: 449.
2. Golubic R, Martin KR, Ekelund U *et al.* Levels of physical activity among a nationally representative sample of people in early old age: results of objective and self-reported assessments. *Int J Behav Nutr Phy* 2014; 11: 58.
3. Peters TM, Moore SC, Xiang YB *et al.* Accelerometer-measured physical activity in Chinese adults. *Am J Prev Med* 2010; 38: 583–91.
4. Lim K, Taylor L. Factors associated with physical activity among older people—a population-based study. *Prev Med* 2005; 40: 33–40.
5. Vance DE, Ross LA, Ball KK, Wadley VG, Rizzo M. Correlates of individual physical activities in older adults. *Act Adapt Aging* 2007; 31: 1–21.
6. Booth ML, Owen N, Bauman A, Clavisi O, Leslie E. Social-cognitive and perceived environment influences associated with physical activity in older Australians. *Prev Med* 2000; 31: 15–22.
7. Brownson RC, Eyster AA, King AC, Brown DR, Shyu YL, Sallis JF. Patterns and correlates of physical activity among US women 40 years and older. *Am J Public Health* 2000; 90: 264–70.
8. Tucker-Seeley RD, Subramanian SV, Li Y, Sorensen G. Neighborhood safety, socioeconomic status, and physical activity in older adults. *Am J Prev Med* 2009; 37: 207–13.
9. Baert V, Gorus E, Mets T, Geerts C, Bautmans I. Motivators and barriers for physical activity in the oldest old: a systematic review. *Ageing Res Rev* 2011; 10: 464–74.
10. McMurdo MET, Argo I, Crombie IK *et al.* Social, environmental and psychological factors associated with objective physical activity levels in the over 65s. *PLoS One* 2012; 7: 1–6.
11. Davis MG, Fox KR, Hillsdon M, Sharp DJ, Coulson JC, Thompson JL. Objectively measured physical activity in a diverse sample of older urban UK adults. *Med Sci Sports Exerc* 2011; 43: 647–54.
12. Koeneman MA, Verheijden MW, Chinapaw MJ, Hopman-Rock M. Determinants of physical activity and exercise in healthy older adults: a systematic review. *Int J Behav Nutr Phy* 2011; 8: 142.
13. Chad KE, Reeder BA, Harrison EL *et al.* Profile of physical activity levels in community-dwelling older adults. *Med Sci Sports Exerc* 2005; 37: 1774–84.
14. Haley C, Andel R. Correlates of physical activity participation in community-dwelling older adults. *J Aging Phys Act* 2010; 18: 375–89.
15. Harris TJ, Owen CG, Victor CR, Adams R, Cook DG. What factors are associated with physical activity in older people, assessed objectively by accelerometry? *Br J Sports Med* 2009; 43: 442–50.
16. Van Cauwenberg J, De Bourdeaudhuij I, De Meester F *et al.* Relationship between the physical environment and physical activity in older adults: a systematic review. *Health Place* 2011; 17: 458–69.

17. Crombie IK, Irvine L, Williams B *et al.* Why older people do not participate in leisure time physical activity: a survey of activity levels, beliefs and deterrents. *Age Ageing* 2004; 33: 287–92.
18. Stathi A, Gilbert H, Fox KR, Coulson J, Davis M, Thompson JL. Determinants of neighborhood activity of adults age 70 and over: a mixed-methods study. *J Aging Phys Act* 2012; 20: 148–70.
19. Moschny A, Platen P, Klaassen-Mielke R, Trampisch U, Hinrichs T. Barriers to physical activity in older adults in Germany: a cross-sectional study. *Int J Behav Nutr Phy* 2011; 8: 121.
20. Kearney PM, Cronin H, O'Regan C *et al.* Cohort profile: the Irish longitudinal study on ageing. *Int J Epidemiol* 2011; 40: 877–84.
21. Craig CL, Marshall AL, Sjostrom M *et al.* International physical activity questionnaire: 12-country reliability and validity. *Med Sci Sports Exerc* 2003; 35: 1381–95.
22. Dhalla S, Kopec JA. The CAGE questionnaire for alcohol misuse: a review of reliability and validity studies. *Clin Invest Med* 2007; 30: 33–41.
23. Kenny RA, Whelan BJ, Cronin H *et al.* The Design of the Irish Longitudinal Study on Ageing. Dublin: Trinity College Dublin, 2010.
24. Russell DW. UCLA Loneliness Scale (Version 3): reliability, validity, and factor structure. *J Pers Assess* 1996; 66: 20–40.
25. Zigmond AS, Snaith RP. The hospital anxiety and depression scale. *Acta Psychiatr Scand* 1983; 67: 361–70.
26. Radloff LS. The CES-D scale: a self-report depression scale for research in the general population. *J Pers Assess* 1977; 1: 385–401.
27. Kowalski K, Rhodes R, Naylor PJ, Tuokko H, MacDonald S. Direct and indirect measurement of physical activity in older adults: a systematic review of the literature. *Int J Behav Nutr Phy* 2012; 9: 148.
28. Chen LJ, Stevinson C, Ku PW, Chang YK, Chu DC. Relationships of leisure-time and non-leisure-time physical activity with depressive symptoms: a population-based study of Taiwanese older adults. *Int J Behav Nutr Phy* 2012; 9: 28.
29. Ku PW, Fox KR, Chen LJ, Chou P. Physical activity and depressive symptoms in older adults: 11-year follow-up. *Am J Prev Med* 2012; 42: 355–62.

Received 6 June 2014; accepted in revised form 3 December 2014

*Age and Ageing* 2015; 44: 592–598  
doi: 10.1093/ageing/afv013  
Published electronically 21 February 2015

© The Author 2015. Published by Oxford University Press on behalf of the British Geriatrics Society.  
All rights reserved. For Permissions, please email: journals.permissions@oup.com

## Association between hand-grip strength and depressive symptoms: Locomotive Syndrome and Health Outcomes in Aizu Cohort Study (LOHAS)

NORIO FUKUMORI<sup>1,2†</sup>, YOSUKE YAMAMOTO<sup>1,3†</sup>, MISA TAKEGAMI<sup>4</sup>, SHIN YAMAZAKI<sup>1</sup>, YOSHIHIRO ONISHI<sup>5</sup>, MIHO SEKIGUCHI<sup>6</sup>, KOJI OTANI<sup>6</sup>, SHIN-ICHI KONNO<sup>6</sup>, SHIN-ICHI KIKUCHI<sup>6</sup>, SHUNICHI FUKUHARA<sup>1,7</sup>

<sup>1</sup>Department of Healthcare Epidemiology, School of Public Health in the Graduate School of Medicine, Kyoto University, Yoshida konoe-cho, Sakyo-ku, Kyoto 606-8501, Japan

<sup>2</sup>Community Medical Support Institute, Faculty of Medicine, Saga University, Saga, Japan

<sup>3</sup>Institute for Advancement of Clinical and Translational Science, Kyoto University Hospital, Kyoto, Japan

<sup>4</sup>Department of Preventive Medicine and Epidemiologic Informatics, National Cerebral and Cardiovascular Center, Suita, Japan

<sup>5</sup>Institute for Health Outcomes and Process Evaluation Research (IHope International), Kyoto, Japan

<sup>6</sup>Department of Orthopedic Surgery, Fukushima Medical University School of Medicine, Fukushima, Japan

<sup>7</sup>Center for Innovation in Clinical Research, Fukushima Medical University, Fukushima, Japan

Address correspondence to: S. Fukuhara. Tel: (+81) 75 753 4646; Fax: (+81) 75 753 4644. Email: fukuhara.shunichi.6m@kyoto-u.ac.jp

### Abstract

**Background:** no study has examined the longitudinal association between hand-grip strength and mental health, such as depressive symptoms.

**Objective:** we investigated the relationship between baseline hand-grip strength and the risk of depressive symptoms.

**Design:** a prospective cohort study.

<sup>†</sup>These authors contributed equally to this article.
